# Supplementary material for: Systematic review of the entomological impact of insecticide-treated nets evaluated using experimental hut trials in Africa
Source: PubMed Central journal article supplement — Curr Res Parasitol Vector Borne Dis. 2021 Aug 18;1:100047. doi: 10.1016/j.crpvbd.2021.100047 (PMC8906077; doi:10.1016/j.crpvbd.2021.100047), 2021-08-18
Supplement: mmc1.pdf [file mmc1.pdf]

## Supplementary file 1

### Systematic review of the entomological impact of insecticide-treated nets evaluated using experimental hut trials in Africa

Rebecca K Nash, Ben Lambert, Raphael N'Guessan, Corine Ngufor, Mark Rowland, Richard Oxborough, Sarah Moore, Patrick Tungu, Ellie Sherrard-Smith, Thomas S Churcher

#### Supplementary methods: Systematic review process

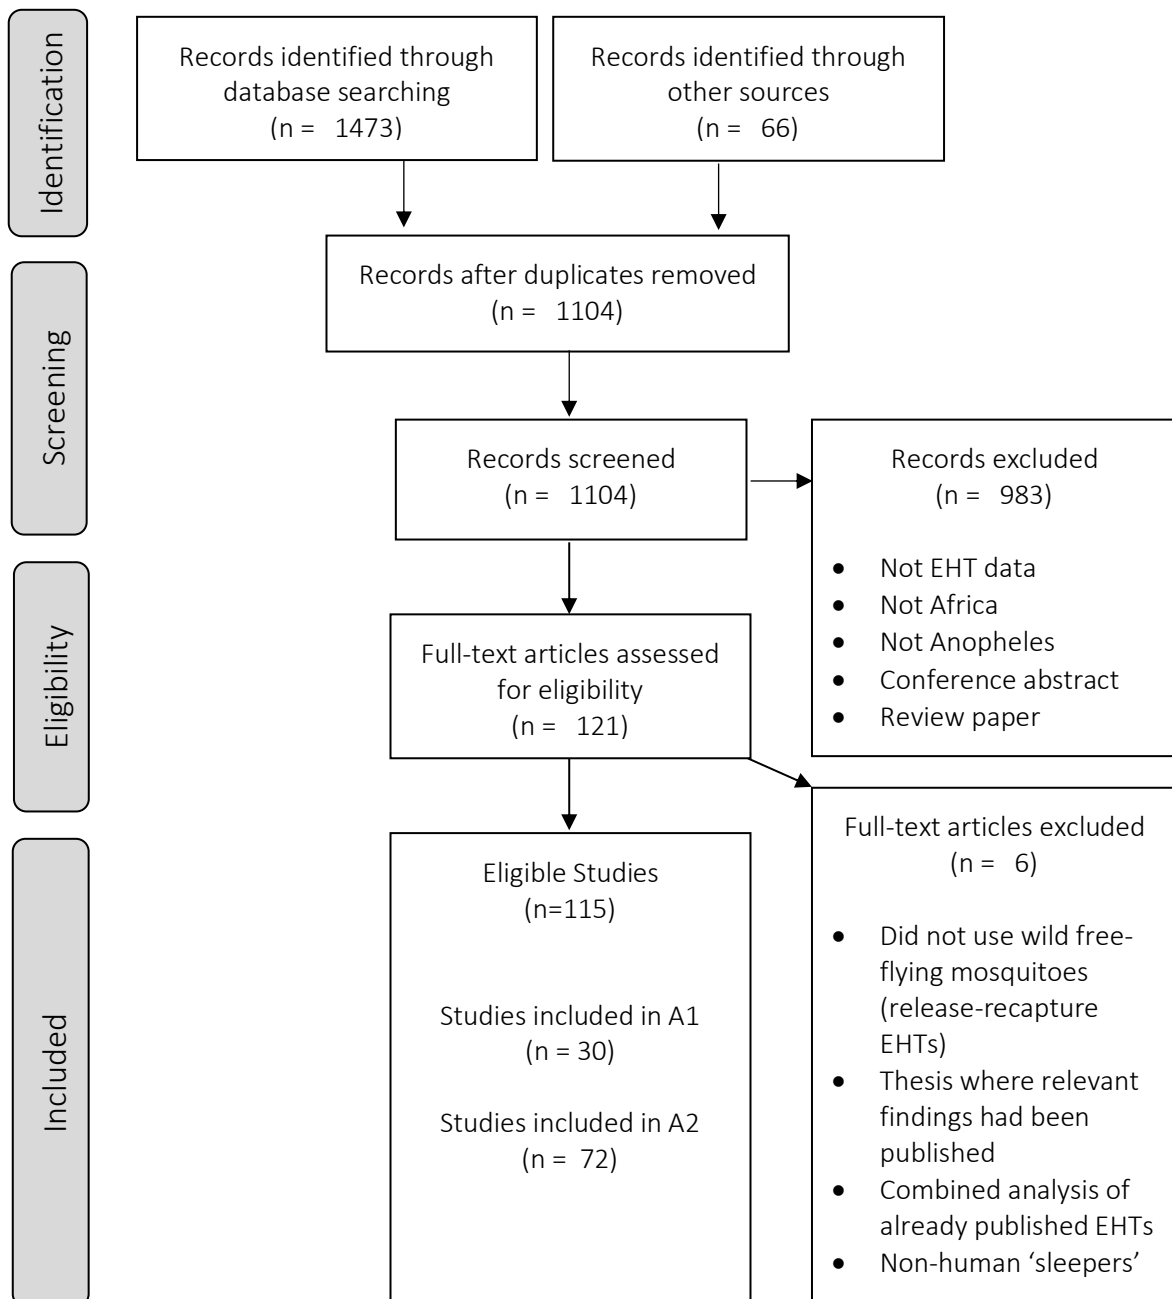

**Supplementary Figure S1.** PRISMA flow diagram to illustrate the phases of the systematic meta-analysis process. The protocol for the review was prospectively registered on PROSPERO (CRD42019117858).

The systematic search sought to collect data on all experimental hut trials (EHTs) investigating insecticide treated nets (ITNs) – encompassing conventionally treated nets (CTNs) and long-lasting insecticidal nets (LLINs) – and indoor residual spraying (IRS). The aim was to create a large database of all known EHTs to date investigating the two most common vector control interventions for malaria. As a systematic meta-analysis of IRS EHT data was recently completed by Sherrard-Smith et al (2018), the main analysis of this paper focused on ITNs, with the intention for the database to continue to be updated with EHT data over time and form the basis for future analyses.

Supplementary Figure S1 shows the systematic process that was followed to identify and select the studies included in the database and which of these were then included in each meta-analysis. The search strings used were adapted for each database, generally following the outline for the MEDLINE database as described in Supplementary Table S1.

**Supplementary Table S1** – Search strings used in MEDLINE search.

| Search | Search term                                                                                                                                                                                                                                                                                                                      |
|--------|----------------------------------------------------------------------------------------------------------------------------------------------------------------------------------------------------------------------------------------------------------------------------------------------------------------------------------|
| 9      | 7 and 8                                                                                                                                                                                                                                                                                                                          |
| 8      | malaria.mp. [mp=title, abstract, original title, name of substance word, subject heading word, floating sub-heading word, keyword heading word, protocol supplementary concept word, rare disease supplementary concept word, unique identifier, synonyms]                                                                       |
| 7      | 5 and 6                                                                                                                                                                                                                                                                                                                          |
| 6      | (hut or huts).mp. [mp=title, abstract, original title, name of substance word, subject heading word, floating sub-heading word, keyword heading word, protocol supplementary concept word, rare disease supplementary concept word, unique identifier, synonyms]                                                                 |
| 5      | 1 or 2 or 3                                                                                                                                                                                                                                                                                                                      |
| 3      | (insecticide treated net* or ITN* or long lasting insecticidal net* or LLIN*).mp. [mp=title, abstract, original title, name of substance word, subject heading word, floating sub-heading word, keyword heading word, protocol supplementary concept word, rare disease supplementary concept word, unique identifier, synonyms] |
| 2      | Insecticide-Treated Bednets/                                                                                                                                                                                                                                                                                                     |
| 1      | (indoor adj2 residual adj2 spray*) or IRS).mp. [mp=title, abstract, original title, name of substance word, subject heading word, floating sub-heading word, keyword heading word, protocol supplementary concept word, rare disease supplementary concept word, unique identifier, synonyms]                                    |

The inclusion and exclusion criteria are shown in Supplementary Table S2. It is important to note that information was extracted for EHTs if data on mosquito outcomes (mortality, feeding, exiting) was not reported in the paper, as long as they fulfilled all other criteria. This is to ensure that a record was kept of all known trials in case contact could be made with the respective authors for the data. Overall, there are 115 EHT studies in the database, 30 of which were included in analysis 1 (A1) and 72 were included in analysis 2 (A2).

**Supplementary Table S2** – Inclusion and exclusion criteria used in the systematic review.

| Inclusion                                                                                                        | Exclusion                                           |
|------------------------------------------------------------------------------------------------------------------|-----------------------------------------------------|
| Study conducted in Africa                                                                                        | Review paper                                        |
| Must have control data                                                                                           | No control data                                     |
| Must be investigating insecticide treated nets, indoor residual spraying or both of these interventions combined | No sleeper rotation                                 |
| Studies must report mosquito mortality data*                                                                     | Not a human sleeper                                 |
|                                                                                                                  | Not Anopheles                                       |
|                                                                                                                  | Not an EHT conducted using a WHO compliant protocol |

\* Information on studies was still extracted if data reported on mortality, blood feeding, exiting and total number of mosquitoes collected was incomplete. Studies were only included in analyses if mosquito mortality and other data relevant to the specific analysis was available. Contact was made with frequent EHT authors in order to try to obtain unpublished data.

**Studies included in A1: Pyrethroid resistance vs EHT survival**

**Supplementary Table S3.** List of studies where a concurrent pyrethroid discriminating dose bioassay was carried out. These studies were used to investigate the association between survival exhibited in pyrethroid resistance bioassays and experimental hut trials of ITNs.

| Study | No. of EHTs | Reference                | Study site                                                          |
|-------|-------------|--------------------------|---------------------------------------------------------------------|
| 1     | 2           | Agossa et al. (2014)     | Akron, Benin<br>Malanville, Benin                                   |
| 2     | 1           | Asale et al. (2014)      | Gilgel Gibe hydropower dam area, Ethiopia                           |
| 3     | 1           | Bayili et al. (2017a)    | Vallée du Kou, Burkina Faso                                         |
| 4     | 3           | Corbel et al. (2010)     | Malanville, Benin<br>Vallée du Kou, Burkina Faso<br>Pitoa, Cameroon |
| 5     | 1           | Ketoh et al. (2018)      | Kolokopé, Togo                                                      |
| 6     | 1           | Koudou et al. (2011)     | Yaokoffikro, Côte d'Ivoire                                          |
| 7     | 1           | Kweka et al. (2017)      | Lower Moshi, Tanzania                                               |
| 8     | 1           | Malima et al. (2013)     | Muheza, Tanzania                                                    |
| 9     | 1           | Malima et al. (2008)     | Muheza, Tanzania                                                    |
| 10    | 2           | Mosha et al. (2008a)     | Lower Moshi, Tanzania                                               |
| 11    | 1           | N'Guessan et al. (2016a) | Cové, Benin                                                         |
| 12    | 1           | Ngufor et al. (2014a)    | Tiassalé, Côte d'Ivoire                                             |
| 13    | 1           | Ngufor et al. (2017)     | Cové, Benin                                                         |
| 14    | 1           | Ngufor et al. (2016a)    | Cové, Benin                                                         |
| 15    | 2           | Ngufor et al. (2014b)    | Vallée du Kou, Burkina Faso<br>Lupiro, Tanzania                     |
| 16*   | 2           | Okumu et al. (2013)      | Lupiro, Tanzania                                                    |
| 17    | 1           | Oxborough et al. (2013)  | Lower Moshi, Tanzania                                               |
| 18    | 1           | Pennetier et al. (2013)  | Malanville, Benin                                                   |
| 19    | 2           | Toe et al. (2018)        | Vallée du Kou, Burkina Faso                                         |

|     |   |                        | Tengrela, Burkina Faso     |
|-----|---|------------------------|----------------------------|
| 20  | 1 | Tungu et al. (2010)    | Muheza, Tanzania           |
| 21* | 1 | Moore et al. (2016)    | Ifakara, Tanzania          |
| 22  | 1 | Ngufor et al. (2016b)  | Cové, Benin                |
| 23  | 1 | Tungu et al. (2016)†   | Muheza, Tanzania           |
| 24  | 1 | Rowland et al. (unp.)  | Moshi, Tanzania            |
| 25  | 1 | Rowland et al. (unp.)† | Muheza, Tanzania           |
| 26  | 1 | Guillet et al. (2001)  | Yaokoffikro, Côte d'Ivoire |
| 27  | 1 | Miller et al. (1991)   | Wali Kunda, The Gambia     |
| 28  | 1 | Mosha et al. (2008b)   | Mabogini, Tanzania         |
| 29  | 1 | Darriet et al. (1999)  | Yaokoffikro, Côte d'Ivoire |
| 30  | 1 | Ngufor et al. (unp.)   | Cové, Benin                |

\* = Studies where the Ifakara hut design was used. These studies were excluded from A1 (but data from these trials are included in Supplementary Figure S4).

† = Unpublished or unpublished report to the WHO Pesticide Evaluation Scheme (WHOPES) at the time of analysis. Now published in Tungu et al. (2021).

## Studies included in A2: Mosquito behaviour as survival increases

**Supplementary Table S4.** List of studies included in meta-analysis A2, which quantifies the impact of ITNs on different mosquito behaviours.

• = study included, ○ = study included but allocated a total number of mosquitoes (half the median) in order to include data that was provided as proportion fed.

| Study | No. of EHTs | Reference                | Study site                                                          | Figure B | Figures C and D |
|-------|-------------|--------------------------|---------------------------------------------------------------------|----------|-----------------|
| 1     | 2           | Agossa et al. (2014)     | Akron, Benin<br>Malanville, Benin                                   | •        | •               |
| 2     | 1           | Badolo et al. (2012)     | Pissy, Burkina Fasso                                                | •        | •               |
| 3     | 1           | Bayili et al. (2015)     | Vallée du Kou, Burkina Faso                                         | •        | •               |
| 4     | 1           | Camara et al. (2018)     | M'bé, Côte d'Ivoire                                                 | •        | •               |
| 5     | 3           | Corbel et al. (2010)     | Malanville, Benin<br>Vallée du Kou, Burkina Faso<br>Pitoo, Cameroon | •        | •               |
| 6     | 1           | Djenontin et al. (2018)  | Malanville, Benin                                                   | •        | •               |
| 7     | 1           | Ketoh et al. (2018)      | Kolokopé, Togo                                                      | •        | •               |
| 8     | 1           | Koffi et al. (2015a)     | M'bé, Côte d'Ivoire                                                 | •        | •               |
| 9     | 1           | Kweka et al. (2017)      | Lower Moshi, Tanzania                                               | •        | •               |
| 10    | 1           | Mahande et al. (2018)    | Magugu, Tanzania                                                    | •        | •               |
| 11    | 1           | Malima et al. (2013)     | Muheza, Tanzania                                                    | •        | •               |
| 12    | 1           | N'Guessan et al. (2010a) | Akron, Benin                                                        | •        | •               |
| 13    | 1           | N'Guessan et al. (2016a) | Cové, Benin                                                         | •        | •               |
| 14    | 1           | Ngufor et al. (2016a)    | Cové, Benin                                                         | •        | •               |
| 15    | 1           | Pennetier et al. (2013)  | Malanville, Benin                                                   | •        | •               |
| 16    | 1           | Tungu et al. (2010)      | Muheza, Tanzania                                                    | •        | •               |
| 17    | 1           | Tungu et al. (2012)      | Muheza, Tanzania                                                    | •        | •               |

|    |   |                          |                                                       |   |   |
|----|---|--------------------------|-------------------------------------------------------|---|---|
| 18 | 1 | Rowland et al. (unp.)    | Moshi, Tanzania                                       | • | • |
| 19 | 1 | Rowland et al. (unp.)*   | Muheza, Tanzania                                      | • | • |
| 20 | 1 | Adeogun et al. (2012)    | New Bussa, Nigeria                                    | • | • |
| 21 | 1 | Allossogbe et al. (2017) | Cové, Benin                                           | • | • |
| 22 | 1 | Asale et al. (2014)      | Gilgel Gibe hydropower dam area, Ethiopia             | • | • |
| 23 | 1 | Chandre et al. (2010)    | Vallée du Kou, Burkina Faso                           | • | • |
| 24 | 1 | Malima et al. (2008)     | Muheza, Tanzania                                      | • | • |
| 25 | 2 | Mosha et al. (2008a)     | Lower Moshi, Tanzania                                 | • | • |
| 26 | 1 | N'Guessan et al. (2001)  | Yaokoffikro, Côte d'Ivoire                            | • | • |
| 27 | 1 | Ngufor et al. (2014a)    | Tiassalé, Côte d'Ivoire                               | • | • |
| 28 | 1 | Ngufor et al. (2017)     | Cové, Benin                                           | • | • |
| 29 | 1 | Ngufor et al. (2014c)    | Akron, Benin                                          | • | • |
| 30 | 2 | Ngufor et al. (2014b)    | Vallée du Kou, Burkina Faso<br>Lupiro, Tanzania       | • | • |
| 31 | 2 | Toe et al. (2018)        | Vallée du Kou, Burkina Faso<br>Tengrela, Burkina Faso | • | • |
| 32 | 1 | Graham et al. (2005)     | Muheza, Tanzania                                      |   | ○ |
| 33 | 1 | Koudou et al. (2011)     | Yaokoffikro, Côte d'Ivoire                            | • |   |
| 34 | 1 | N'Guessan et al. (2010b) | Ladji, Benin                                          | • | • |
| 35 | 1 | N'Guessan et al. (2009)  | Ladji, Benin                                          | • | • |
| 36 | 1 | N'Guessan et al. (2007)  | Malanville, Benin                                     | • | • |
| 37 | 1 | Oxborough et al. (2013)  | Moshi, Tanzania                                       | • | • |
| 38 | 1 | Winkler et al. (2012)    | M'bé, Côte d'Ivoire                                   | • | • |
| 39 | 1 | Tungu et al. (2017a)     | Muheza, Tanzania                                      |   | ○ |
| 40 | 1 | Bayili et al. (2017b)    | Vallée du Kou, Burkina Faso                           |   | ○ |
| 41 | 1 | Tungu et al. (2017b)     | Muheza, Tanzania                                      |   | ○ |
| 42 | 1 | N'Guessan et al. (2016b) | M'bé, Côte d'Ivoire                                   | • | • |
| 43 | 1 | Ngufor et al. (2016b)    | Cové, Benin                                           | • | • |
| 44 | 1 | Tungu et al. (2016)*     | Muheza, Tanzania                                      | • | • |
| 45 | 1 | Koffi et al. (2015b)     | M'bé, Côte d'Ivoire                                   |   | ○ |
| 46 | 1 | Koffi et al. (2015c)     | M'bé, Côte d'Ivoire                                   |   | ○ |
| 47 | 1 | N'Guessan et al. (2015a) | M'bé, Côte d'Ivoire                                   |   | ○ |
| 48 | 1 | Kweka et al. (2015)      | Moshi, Tanzania                                       |   | ○ |
| 49 | 1 | Tungu et al. (2015a)     | Muheza, Tanzania                                      |   | ○ |
| 50 | 1 | Tungu et al. (2015b)     | Muheza, Tanzania                                      |   | ○ |
| 51 | 1 | N'Guessan et al. (2015b) | M'bé, Côte d'Ivoire                                   |   | ○ |
| 52 | 1 | Tungu et al. (2013)      | Muheza, Tanzania                                      |   | ○ |
| 53 | 1 | Sidick et al. (2011)     | Malanville, Benin                                     |   | ○ |
| 54 | 1 | Chabi et al. (2009)      | Malanville, Benin                                     |   | ○ |
| 55 | 1 | Tungu et al. (2009)      | Muheza, Tanzania                                      |   | ○ |
| 56 | 1 | Dabire et al. (2008)     | Vallée du Kou, Burkina Faso                           |   | ○ |
| 57 | 1 | Tungu et al. (2008)      | Muheza, Tanzania                                      |   | ○ |

|    |   |                           |                                                   |   |   |
|----|---|---------------------------|---------------------------------------------------|---|---|
| 58 | 1 | Chouaibou et al. (2006)   | Pitoea, Cameroon                                  | • | • |
| 59 | 1 | Corbel et al. (2004)      | Contonou, Benin                                   | • | • |
| 60 | 2 | Fane et al. (2012)        | Koumantou, Mali<br>Sélingué, Mali                 | • | • |
| 61 | 1 | Fanello et al. (1999)     | Yaokoffikro, Côte d'Ivoire                        | • | • |
| 62 | 1 | Guillet et al. (2001)     | Yaokoffikro, Côte d'Ivoire                        | • | • |
| 63 | 2 | Hougard et al. (2003)     | M'bé, Côte d'Ivoire<br>Yaokoffikro, Côte d'Ivoire | • | • |
| 64 | 1 | Kitau et al. (2014)       | Moshi, Tanzania                                   | • | • |
| 65 | 1 | Kolaczinski et al. (2000) | Yaokoffikro, Côte d'Ivoire                        | • | • |
| 66 | 1 | Malima et al. (2009)      | Moshi, Tanzania                                   | • | • |
| 67 | 1 | Miller et al. (1991)      | Wali Kunda, The Gambia                            | • | • |
| 68 | 2 | Mosha et al. (2008b)      | Mabogini, Tanzania                                | • | • |
| 69 | 1 | Darriet et al. (1999)     | Yaokoffikro, Côte d'Ivoire                        | • | • |
| 70 | 2 | Sanou et al. (unp.)       | Tengrela, Burkina Faso<br>Tiefora, Burkina Faso   | • | • |
| 71 | 1 | Tungu et al. (unp.)       | Muheza, Tanzania                                  | • | • |
| 72 | 1 | Ngufor et al. (unp.)      | Cové, Benin                                       | • | • |

\* = Unpublished or unpublished report to the WHO Pesticide Evaluation Scheme (WHOPES) at the time of analysis. Now published in Tungu et al. (2021).

## Supplementary information on the EHT database

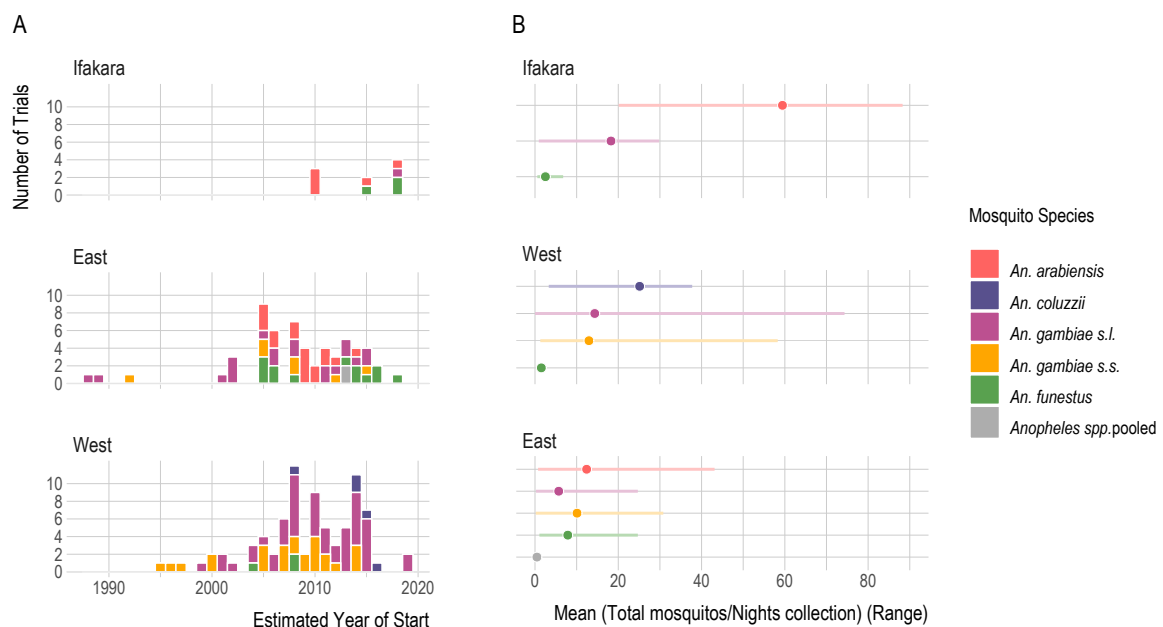

**Supplementary Figure S2.** (A) The number of experimental hut trials summarised by the estimated year of start, hut design and mosquito species. Trials are counted more than once if they presented data for multiple mosquito species. (B) Mean and range of the number of mosquitoes entering control huts of each design per night, as estimated from the total number of mosquitoes collected in the trial over the number of nights of collection.

The earliest trial identified used the East African hut design and took place in 1988, whereas the first trials identified using the West African and Ifakara designs were in 1995 and 2010 respectively (Supplementary Figure S2A). The greatest number of trials were carried out in 2008 (n=16), three of which presented data for multiple mosquito species.

Supplementary Figure S2B shows that there was substantial variation in the number of mosquitoes collected per night, particularly in Ifakara and West African huts. In east Africa, the mean number of *An. arabiensis* caught per night in East African and Ifakara hut designs was greater than for other species, but the range was also larger. The mean number of *An. funestus* collected per night was consistently low in all hut designs. Overall, Ifakara huts collected the most mosquitoes per night, followed by West African then East African huts.

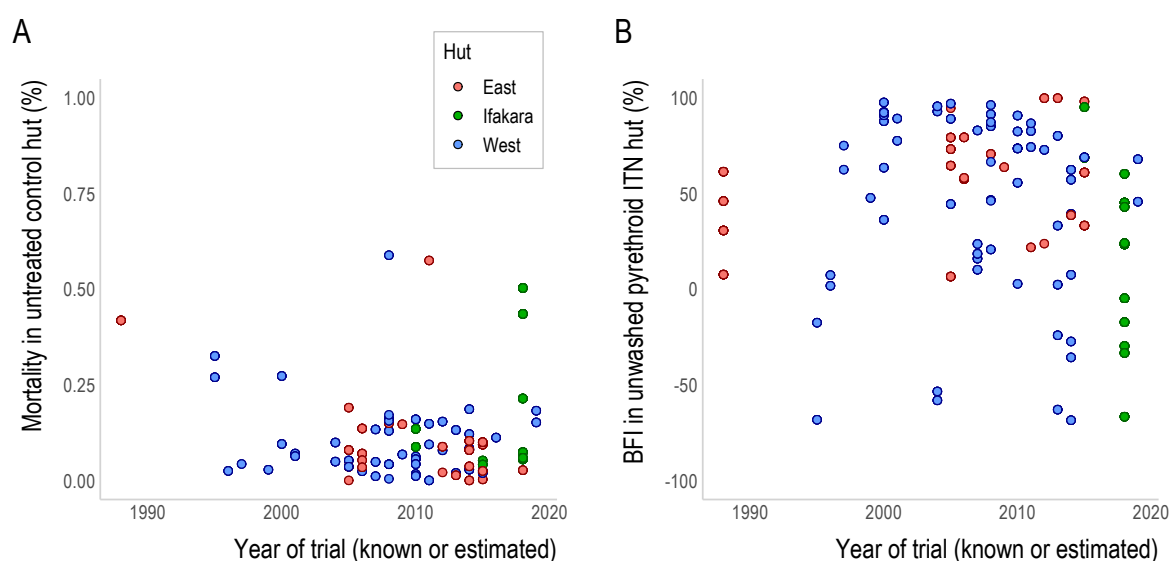

**Supplementary Figure S3.** (A) The percentage mosquito mortality exhibited in EHT arms evaluating untreated nets over time. (B) The percentage blood-feeding inhibition for mosquitoes in unwashed pyrethroid-only ITN huts over time. (Two datapoints that were below -100% were removed to aid visual inspection of these data.) If the trial start date was not stated, then it was estimated using the average time between known trial dates and their publication. Simple summary statistics for linear and logistic regression are provided in Supplementary Table S5. Plots are not included within figures as it is unlikely there has been a consistent change over time.

There was no evidence of a change in mortality in mosquitoes entering the control huts (Supplementary Figure S3A, Supplementary Table S5). An initial exploratory analysis of the raw data across trials revealed significant decreasing trends in the proportion of mosquitoes being inhibited from blood-feeding in pyrethroid-only ITN huts over time (Supplementary Figure S3B, Supplementary Table S5).

**Supplementary Table S5.** Summary statistics for (A) the logistic regression of trial date and mortality in pyrethroid-only ITN huts and (B-C) the linear regressions of trial date and (B) mortality in control huts and (C) blood-feeding inhibition in pyrethroid-only ITN huts. Time was included as the dependent variable in all plots with no other covariates included. Significance of the time variable (p-value) was estimated using a likelihood ratio test.

| <b>Mortality in pyrethroid-only ITN huts over time</b>                |          |            |         |          |
|-----------------------------------------------------------------------|----------|------------|---------|----------|
|                                                                       | Estimate | Std. Error | Z value | p- value |
| Intercept                                                             | 34.67    | 1.40       | 24.78   | <2e-16   |
| Trial Year                                                            | -0.02    | <0.01      | -25.69  | <2e-16   |
| <b>Mortality in control huts over time</b>                            |          |            |         |          |
|                                                                       | Estimate | Std. Error | Z value | p- value |
| Intercept                                                             | 19.70    | 36.42      | 0.54    | 0.589    |
| Trial Year                                                            | -0.01    | 0.02       | -0.595  | 0.552    |
| <b>Blood-feeding inhibition in pyrethroid-only ITN huts over time</b> |          |            |         |          |
|                                                                       | Estimate | Std. Error | Z value | p- value |
| Intercept                                                             | 60.86    | 7.03       | 8.66    | <2e-16   |
| Trial Year                                                            | -0.03    | <0.01      | -8.64   | <2e-16   |

### **Supplementary information on A1: Pyrethroid resistance vs EHT survival**

Analyses A1 used data from EHTs investigating pyrethroid-only ITNs, where mosquito mortality in EHTs and concurrent pyrethroid susceptibility bioassays were carried out. Mosquitoes collected in the 3 eligible trials using the Ifakara hut design exhibited consistently low levels of EHT mortality, regardless of the level of insecticide resistance measured in the wild mosquito population (Supplementary Figure S4). Due to the outlying trend shown by the data, the small number of eligible trials, and Ifakara huts only being used in one trial site, it was decided to exclude Ifakara trials from further analysis.



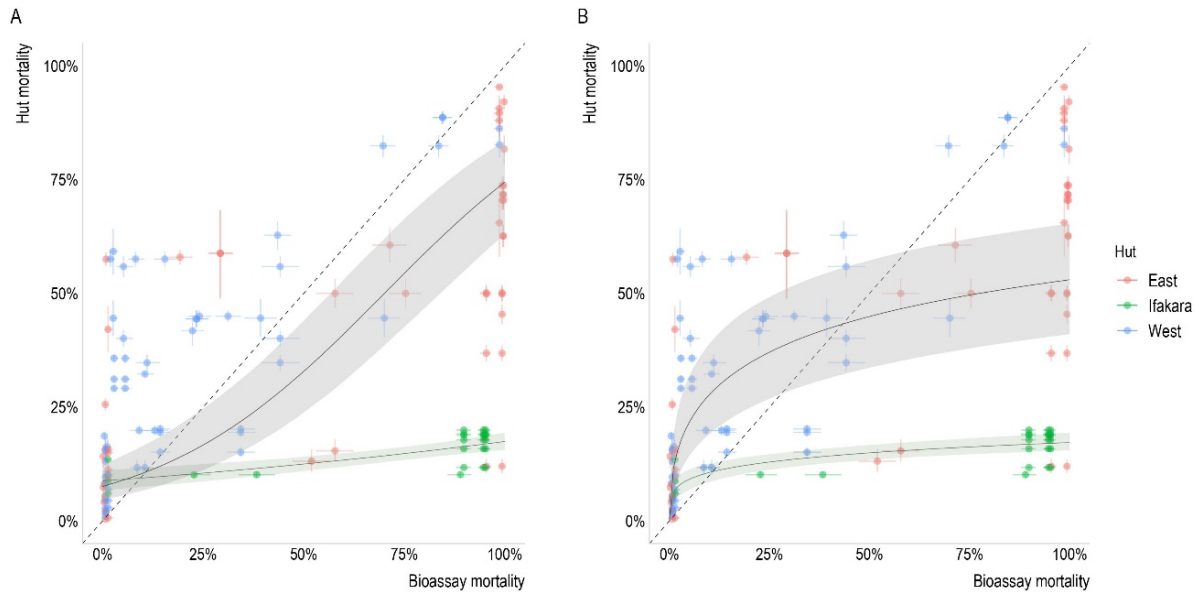

**Supplementary Figure S4. Comparison of models fit to East and West African huts designs (combined) and Ifakara.** A) Logistic model and B) Log-logistic model. Plots to illustrate the disparity concerning the predicted relationship between mortality observed in pyrethroid resistance bioassays and experimental hut trials in East and West African hut designs (grey) and the Ifakara hut design (green).

## Supplementary information on A2: Association between different EHT outcomes

### Alternative function considered for deterrence

In addition to a three-parameter curved function for deterrence, a simple linear function with only one parameter was also considered (Supplementary Table S6). The expected log pointwise predictive density (elpd) values - obtained from leave-one-out cross validation - evaluates the goodness of fit of the statistical model to the data. These values suggest that the fit for option 1 is very slightly favoured, but the fits are very similar.

**Supplementary Table S6. Comparison of different functions for deterrence.** The two options considered for the functional relationship between deterrence and hut trial survival ( $\theta_H^i$ ). The expected log pointwise predictive density (elpd) values describe the goodness of fit to all data irrespective of hut design and the fits to East African and West African trial data separately (with higher values indicating better goodness of fit). Option 1 is a three-parameter ( $\delta_1, \delta_2, \delta_3$ ) function, whereas option 2 is a single parameter ( $\delta_1$ ) function.

| Equation describing the change in deterrence with increasing hut survival                                                                | Elpd value (leave-one-out cross-validation) |                  |                  |
|------------------------------------------------------------------------------------------------------------------------------------------|---------------------------------------------|------------------|------------------|
|                                                                                                                                          | <i>All data</i>                             | <i>East only</i> | <i>West only</i> |
| Option 1 – Used in A2<br>$g(\theta_H^i, \delta_1, \delta_2, \delta_3) = \delta_1(\exp(\delta_2(1 - \exp(\delta_3\theta_H^i))/\delta_3))$ | -4314.2                                     | -1185.5          | -3110.7          |

Option 2 – Not used in A2

$$g(\theta_H^i, \delta_1) = \delta_1 (1 - \theta_H^i)$$

-4314.6

-1117.0

-3197.2

The ratio between the number of mosquitoes collected in control huts and intervention huts fit using option 1 and option 2 are displayed in Supplementary Figure S5A and S5D respectively. They both show very similar fits, but for option 2, the ratio of the number of mosquitoes collected in control huts compared to intervention huts falls below zero beyond 85% hut survival - suggesting that greater numbers of mosquitoes are collected from intervention huts compared to control huts. The probability of deterrence for each option is shown in Supplementary Figure S5B and S5E. For option 1, although deterrence declines it doesn't fall to zero when the probability of hut survival is high (Supplementary Figure S5B). Option 2 fixes the probability of hut survival to 1 when the probability of deterrence is zero, therefore the 95% credible interval for deterrence is very small when the probability of hut survival is high (Supplementary Figure S5E). Ultimately, to allow the model more flexibility and more realistic uncertainty when the probability of hut survival is high, option 2 was not chosen.

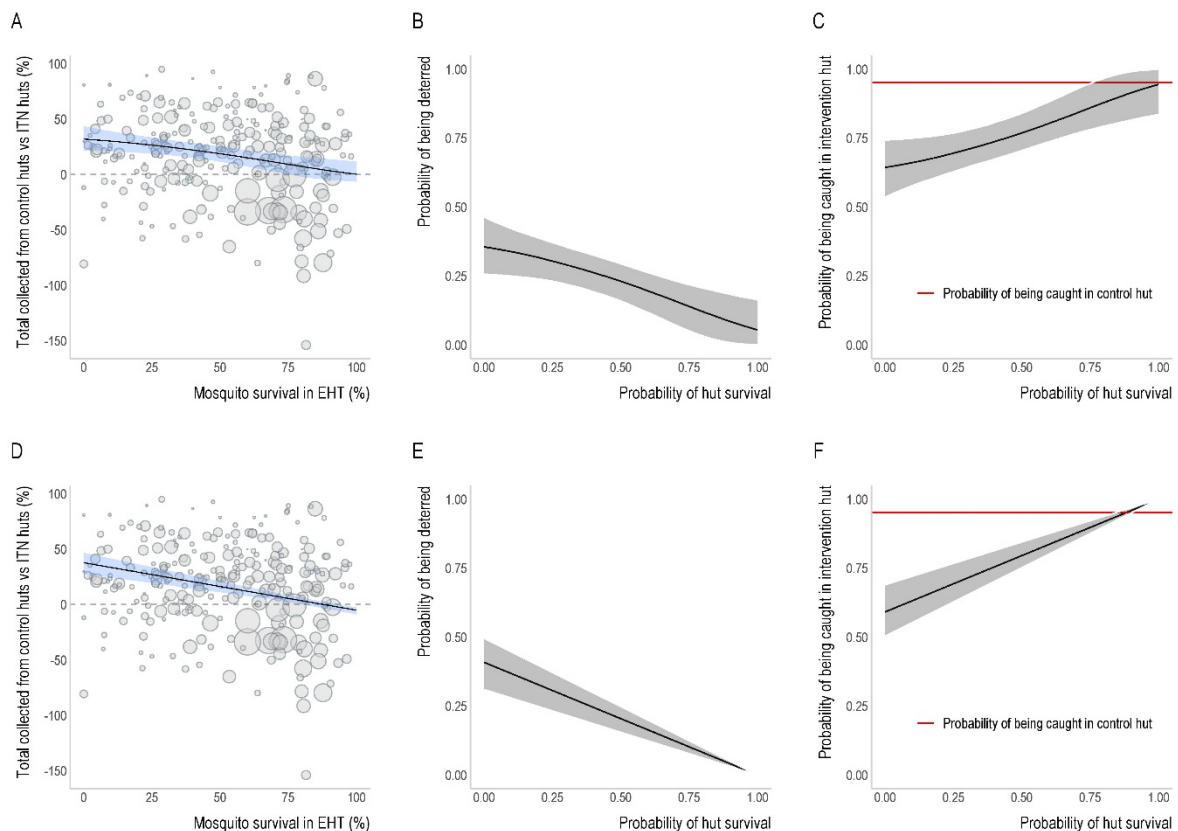

**Supplementary Figure S5. The two options considered for the functional relationship between deterrence and hut trial survival described in Supplementary Table S6. A) Option 1 and D) Option 2 fit to all data irrespective of hut design. B-C and E-F) The probability of being deterred and the probability of being caught in an intervention hut as the probability of hut survival increases for Option 1 and Option 2 respectively. The red line in panels C and F depicts the constant probability of being caught in a control hut, irrespective of hut design and the level of hut survival.**

## The probability of deterrence for East and West African hut designs

Supplementary Figure S6 shows the separate estimates for the probability of deterrence and the ratio between the number of mosquitoes collected in control huts and intervention huts for data from East and West African hut designs.

When the model is fit to East African data, although deterrence declines, there is very little change in the probability of deterrence as the probability of hut survival increases. However, there are fewer data points for the number of mosquitoes collected at greater levels of hut survival for East African huts, which may influence the fit. The West African fit is more similar to the combined fit to all data, simply reflecting that West African trials make up the bulk of the data. However, at ~80% hut trial survival the ratio falls below zero, indicating that more mosquitoes are collected from intervention huts than control huts at high survival. There is considerable variability in the number of mosquitoes caught in the control versus intervention huts and how this changes with hut survival. This difference in deterrence between studies with the same hut design appears greater than the differences between designs.

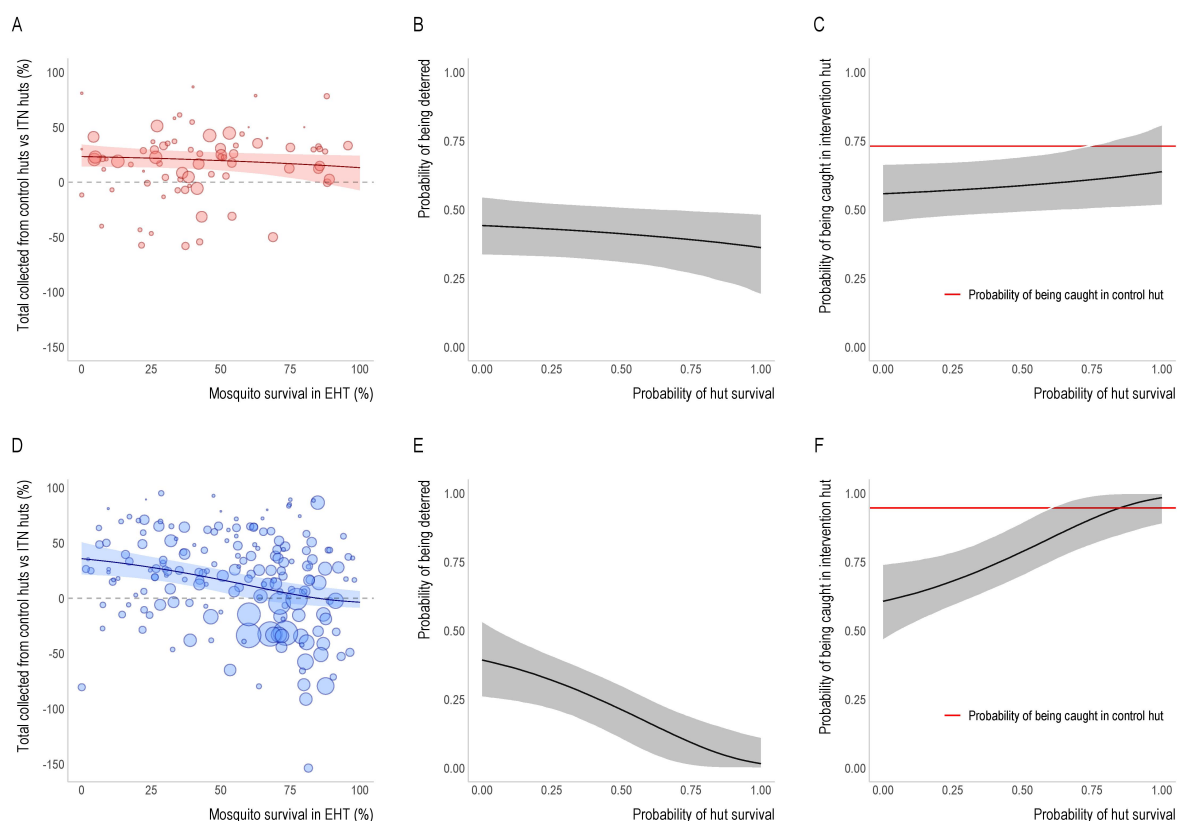

**Supplementary Figure S6. Difference in deterrence models for the two hut designs.** The ratio between the number of mosquitoes collected from control huts compared to intervention huts for A) East African trials and D) West African trials. B-C and E-F) The probability of being deterred and the probability of being caught in an intervention hut as the probability of hut survival increases for East African and West African huts respectively. The red lines in panels C and F depict the constant probability of being caught in a control hut of each design, irrespective of the level of hut survival.

## The probabilities of each outcome of a mosquito feeding attempt using the logistic fit

To predict the impact of resistance on the probability of each outcome of a mosquito feeding attempt, the logistic and log-logistic models were fit to data from each hut design separately. The log-logistic fit by hut design is shown in the main paper (Figure 4) and the logistic fit is shown here in Supplementary Figure S7. Panel A shows the logistic relationship between hut survival and bioassay survival by hut design. Lines are broadly similar with mosquitoes in West African huts generally having a higher level of survival for the same level of pyrethroid resistance. Similar to the predictions using the log-logistic fit, the probability of a mosquito successfully blood-feeding in an East African hut remains very low as resistance increases, only reaching 3.5% (Supplementary Figure S7B). Whereas, the probability in West African huts rises from 1% to 52% in a highly resistant population (Supplementary Figure S7C). The probability of being deterred appears high in mosquitoes attempting to feed in East huts at all levels of resistance, only reducing by 5% to 38%. Deterrence falls much lower for West huts, declining from 31% in a susceptible population to 3% in a highly resistant population. The probability of exiting unfed from West huts rises from 17% to 45% before declining to 39% at high resistance. Whilst the probability of exiting unfed from East huts increases 38% to 52%.

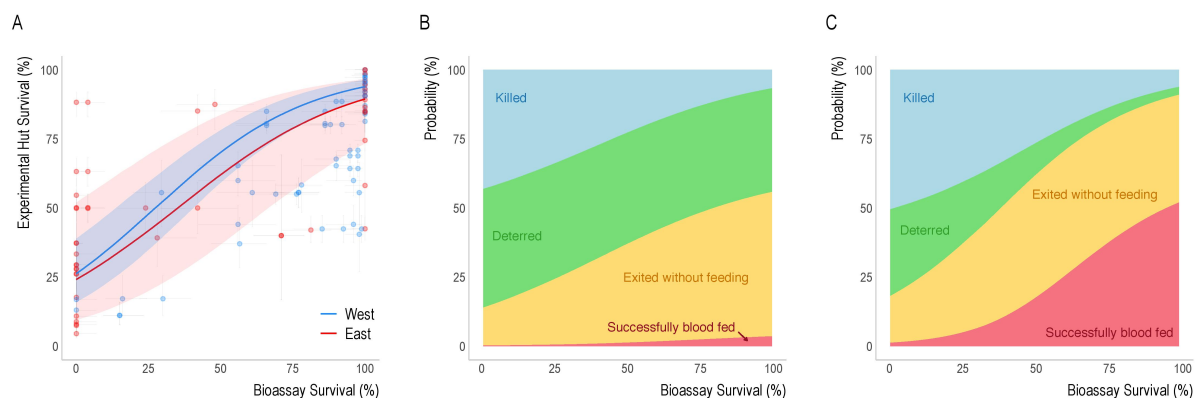

**Supplementary Figure S7. Summary of the difference between East and West African hut design and how this is predicted to change the outcome of a single blood-feeding event.** A) The logistic relationship between experimental hut trial survival and bioassay survival for trials of each hut design. B-C) Average probability that blood feeding mosquitoes will be killed, exit without feeding, be deterred from entering or successfully blood feed in B) East African huts or C) West African huts, assuming that the relationship between hut trial mortality and bioassay mortality is determined by the logistic model (see Figure 4 in the main text for other model fits).

## Model comparisons

Models were fit to data for all ITNs identified in the systematic review irrespective of the insecticide used. This makes the assumption that though the mortality induced by the ITN might vary, the relationship between mortality and other factors influencing ITN efficacy (i.e. blood-feeding and deterrence) remains constant. These models were compared to models fit to restricted data for pyrethroid-only, pyrethroid-only and pyrethroid-PBO or pyrethroid-only and pyrethroid-combination nets (Supplementary Table S7). Models were evaluated by comparing the fit of the different models (using elpd) to a common dataset (i.e. the pyrethroid-only ITN data). The difference in elpd between the models fit with the reduced

and full dataset is sufficiently small (relative to the magnitude of the elpd) to justify the use of the full dataset which are presented in the main text.

**Supplementary Table S7. Table comparing the model fits for models fit with different datasets.**

Models were fit using four datasets: 1) All nets: Including data for all ITNs irrespective of the insecticide on the net (all other datasets are nested within these data), 2) Pyrethroid-only nets: All ITNs incorporating pyrethroid insecticide only, 3) Pyrethroid-only and pyrethroid-combination nets: All pyrethroid-only ITNs and pyrethroid combined with an alternative insecticide or the synergist piperonyl butoxide (PBO) and 4) Pyrethroid-only ITNs and pyrethroid-PBO ITNs. Model comparisons were performed by estimating the goodness of fit to data common between all four models (pyrethroid-only ITN data).

| <b>Deterrence models</b>               |           |         |          |       |        |
|----------------------------------------|-----------|---------|----------|-------|--------|
| Model                                  | Elpd_diff | Se_diff | Elpd_loo | P_loo | looic  |
| 3                                      | 0.0       | 0.0     | -2436.2  | 238.7 | 4872.4 |
| 1                                      | -0.3      | 3.8     | -2436.5  | 241.2 | 4873.0 |
| 4                                      | -3.9      | 3.8     | -2440.1  | 238.9 | 4880.2 |
| 2                                      | -8.3      | 5.0     | -2444.5  | 232.0 | 4889.0 |
| <b>Successful blood-feeding models</b> |           |         |          |       |        |
| Model                                  | Elpd_diff | Se_diff | Elpd_loo | P_loo | looic  |
| 2                                      | 0.0       | 0.0     | -1914.7  | 299.7 | 3829.4 |
| 4                                      | -4.3      | 18.8    | -1919.0  | 286.8 | 3838.1 |
| 3                                      | -17.8     | 38.9    | -1932.5  | 287.7 | 3865.1 |
| 1                                      | -38.0     | 47.9    | -1952.7  | 267.2 | 3905.4 |

**Supplementary Table S8. Summary of all functional relationships and best fit parameter values.** Table shows the functional relationships used in A1-2 and the mean parameter values from fitting all ITN data (either grouping east and west hut design together or separating dataset). Notation in this manuscript is compared to that previously used.

| Probability                                                                                                                                                                                                                                                                                                                                                                                                                                                                                                                                                                                                                                                                                                                                                                                                                        | Notation as in Griffin et al (2010) | Mean parameter values                                       |                                                             |                                                             |
|------------------------------------------------------------------------------------------------------------------------------------------------------------------------------------------------------------------------------------------------------------------------------------------------------------------------------------------------------------------------------------------------------------------------------------------------------------------------------------------------------------------------------------------------------------------------------------------------------------------------------------------------------------------------------------------------------------------------------------------------------------------------------------------------------------------------------------|-------------------------------------|-------------------------------------------------------------|-------------------------------------------------------------|-------------------------------------------------------------|
|                                                                                                                                                                                                                                                                                                                                                                                                                                                                                                                                                                                                                                                                                                                                                                                                                                    |                                     | All data                                                    | West huts only                                              | East huts only                                              |
| <p><b>Relationship between EHT survival (<math>\theta_H^i</math>) and susceptibility bioassay survival (<math>\theta_B^i</math>)</b></p> <p>Priors: <math>\alpha \sim N(0,2)</math> and <math>\beta \sim C(0,1)</math></p> <p>Logistic fit:</p> $\theta_H^i = 1 - (1/(1 + \exp(-((1 - \theta_B^i) - \alpha)\beta)))$ <p>Log-logistic fit:</p> $\theta_H^i = 1 - (1/(1 + ((1 - \theta_B^i)/\beta)^{-\alpha}))$                                                                                                                                                                                                                                                                                                                                                                                                                      | $1 - l_p$                           | $\alpha = 0.7$<br>$\beta = 3.57$                            | $\alpha = 0.73$<br>$\beta = 3.78$                           | $\alpha = 0.66$<br>$\beta = 3.29$                           |
| <p><b>Relationship between EHT survival (<math>\theta_H^i</math>) and the probability of mosquitoes being deterred (<math>\theta_D^i</math>) from entering a hut with an ITN</b></p> <p>Priors: <math>\delta_1 \sim N(0.8,1)</math>, <math>\delta_2 \sim N(0.8,1)</math> and <math>\delta_3 \sim N(3,2)</math></p> $\theta_D^i = \delta_1 (\exp(\delta_2 (1 - \exp(\delta_3 \theta_H^i)))/\delta_3)$ <p>Difference in the proportion of mosquitoes collected in control huts (<math>\theta_C^i</math>) relative to ITN huts (<math>\theta_I^i</math>) as survival increases:</p> $\theta_I^i = 1 - \theta_D^i$ $\delta_C = (\theta_C^i - \theta_I^i) / \theta_C^i$ <p>*The probability of mosquitoes entering and being caught in control huts is assumed to remain constant, independent of the level of survival in the hut.</p> | $m_1$                               | $\delta_1 = 0.36$<br>$\delta_2 = 0.49$<br>$\delta_3 = 2.57$ | $\delta_1 = 0.39$<br>$\delta_2 = 0.66$<br>$\delta_3 = 3.13$ | $\delta_1 = 0.45$<br>$\delta_2 = 0.07$<br>$\delta_3 = 1.76$ |
| <p><b>Relationship between EHT survival (<math>\theta_H^i</math>) and the probability of successfully blood-feeding (<math>\theta_{SF}^i</math>) after entering a hut with an ITN</b></p>                                                                                                                                                                                                                                                                                                                                                                                                                                                                                                                                                                                                                                          |                                     |                                                             |                                                             |                                                             |

|                                                                                                             |                                 |                                        |                                        |                                        |
|-------------------------------------------------------------------------------------------------------------|---------------------------------|----------------------------------------|----------------------------------------|----------------------------------------|
| Priors: $\delta_4 \sim N(0,0.01)$ and $\delta_5 \sim N(8,0.3)$                                              |                                 |                                        |                                        |                                        |
| $\theta_{SF}^i = 1 - (\exp(\delta_4(1 - \exp(\delta_5\theta_H^i)))/\delta_5)$                               | $k_1$                           | $\delta_4 = 0.04$<br>$\delta_5 = 4.66$ | $\delta_4 = 0.04$<br>$\delta_5 = 5.13$ | $\delta_4 = 0.01$<br>$\delta_5 = 3.43$ |
| <b>Probability of exiting without feeding after entering a hut with an ITN (<math>\theta_{EU}^i</math>)</b> | $j_1$<br>$= 1 - k_1$<br>$- l_1$ | Parameters defined above               |                                        |                                        |
| $\theta_{EU}^i = 1 - \theta_{SF}^i - (1 - \theta_H^i)$                                                      |                                 |                                        |                                        |                                        |

## References

Adeogun, A.O.O., Olojede, J.B., Oduola, A.O., Awolola, T.S., 2012. Efficacy of a combination long lasting insecticidal net (PermaNet® 3.0) against pyrethroid resistant *Anopheles gambiae* s.s. and *Culex quinquefasciatus*: an experimental hut trial in Nigeria. *Nigerian Journal of Clinical & Biomedical Research*. 6:37-50.

Agossa, F.R., Padonou, G.G., Gnanguenon, V., Oke-Agbo, F., Zola-Sahossi, J., Degnonvi, H., Salako, A., Sezonlin, M., Akogbeto, M.C., 2014. Laboratory and field evaluation of the impact of washings on the effectiveness of LifeNetReg., OlysetReg. and PermaNetReg. 2.0 in two areas, where there is a high level of resistance of *Anopheles gambiae* to pyrethroids, Benin, West Africa. *Malaria Journal* 13.

Allossogbe, M., Gnanguenon, V., Agossa, F.R., Zola-Sahossi, J., Akinro, B., Houtoukpe, A., Anagonou, R., Akogbeto, M., 2017. Comparative efficacy of five types of long-lasting insecticide-treated nets (PermaNet 3.0®, PermaNet 2.0®, Olyset Plus®, Olyset Net®, and LifeNet®) in a semi-natural environment against resistant *Anopheles gambiae sensu lato* and *Mansonia africana* in Cove, Benin. *Int. J. Mosq. Res.* 4, 07–13.

Asale, A., Getachew, Y., Hailesilassie, W., Speybroeck, N., Duchateau, L., 2014. Evaluation of the efficacy of DDT indoor residual spraying and long-lasting insecticidal nets against insecticide resistant populations of *Anopheles arabiensis* Patton (Diptera: Culicidae) from Ethiopia using experimental huts. *Parasites and Vectors* 7, 131–131.  
<https://doi.org/10.1186/1756-3305-7-131>

Badolo, A., Guelbeogo, W., Tiono, A., Traore, A., Sagnon, N., 2012. Experimental hut evaluation of Fendona 6SC-treated bednets and interceptor long-lasting nets against *Anopheles gambiae* s.l. in Burkina Faso. *Journal of Vector Borne Diseases* 49, 234–241.

Bayili, K., 2015. Evaluation de l'efficacité d'une moustiquaire bitraitée (Olyset Duo) sur les populations d'*Anopheles gambiae* s.l résistantes aux pyréthrinoïdes pour le contrôle du paludisme. [Master's degree thesis]. Research Institute of Health Sciences. Available at: <http://www.beep.ird.fr/collect/upb/index/assoc/IDR-2015-BAY-EVA/IDR-2015-BAY-EVA.pdf>

Bayili, K., N'do, S., Namountougou, M., Sanou, R., Ouattara, A., Dabire, R.K., Ouedraogo, A.G., Malone, D., Diabate, A., 2017a. Evaluation of efficacy of Interceptor G2, a long-lasting insecticide net coated with a mixture of chlorfenapyr and alpha-cypermethrin, against pyrethroid resistant *Anopheles gambiae* s.l. in Burkina Faso. *Malaria journal* 16, 190–190. <https://doi.org/10.1186/s12936-017-1846-4>

Bayili, K., et al. 2017b. Phase II field evaluation of long-lasting nets DawaPlus 3.0 (deltamethrin and PBO in roof panel; deltamethrin alone in the side panels) and DawaPlus 4.0 (deltamethrin and PBO) of Tana Netting against natural populations of *Anopheles gambiae* s.l in Burkina Faso [Unpublished report to the WHO Pesticide Evaluation Scheme]. Report of the twentieth WHOPEs working group meeting. WHO/HQ, Geneva 20-24 March 2017. Review of: Interceptor G2 LN, DawaPlus 3.0 LN, DawaPlus 4.0 LN, SumiLarv 2 MR, Chlorfenapyr 240 SC. WHO/HTM/NTD/WHOPEs/2017.04.

Camara, S., Ahoua Alou, L.P., Koffi, A.A., Clegban, Y.C.M., Kabran, J.-P., Koffi, F.M., Koffi, K., Penetier, C., 2018. Efficacy of Interceptor G2, a new long-lasting insecticidal net against wild pyrethroid-resistant *Anopheles gambiae* s.s. from Cote d'Ivoire: a semi-field trial. *Parasite* 25, 42–42. <https://doi.org/10.1051/parasite/2018042>

Chabi, J., et al. 2009. Efficacy of a deltamethrin long-lasting insecticidal net (DawaPlus 2nd generation - Tana netting) against wild susceptible populations of *Anopheles gambiae* in experimental huts, Benin (DOC/IRD/CREC/01/09). [Unpublished report to the WHO Pesticide Evaluation Scheme (WHOPEs).] Report of the thirteenth WHOPEs working group meeting. WHO/HQ, Geneva 28-30 July 2009. Review of: Olyset LN, DawaPlus 2.0 LN, Tianjin Yorkool LN. WHO/HTM/NTD/WHOPEs/2009.5.

Chandre, F., Dabire, R.K., Hougard, J.M., Djogbenou, L.S., Irish, S.R., Rowland, M., N'Guessan, R., 2010. Field efficacy of pyrethroid treated plastic sheeting (durable lining) in combination with long lasting insecticidal nets against malaria vectors. *Parasites and Vectors* 3.

Chouaibou, M., Simard, F., Chandre, F., Etang, J., Darriet, F., Hougard, J.-M., 2006. Efficacy of bifenthrin-impregnated bednets against *Anopheles funestus* and pyrethroid-resistant *Anopheles gambiae* in North Cameroon. *Malaria journal* 5, 77–77.

Corbel, V., Chandre, F., Brengues, C., Akogbéto, M., Lardeux, F., Hougard, J.M., Guillet, P., 2004. Dosage-dependent effects of permethrin-treated nets on the behaviour of *Anopheles gambiae* and the selection of pyrethroid resistance. *Malaria Journal* 3. <https://doi.org/10.1186/1475-2875-3-22>

Corbel, V., Chabi, J., Dabire, R.K., Etang, J., Nwane, P., Pigeon, O., Akogbetto, M., Hougard, J.M., 2010. Field efficacy of a new mosaic long-lasting mosquito net (PermaNetReg. 3.0) against pyrethroid-resistant malaria vectors: a multi centre study in Western and Central Africa. *Malaria Journal* 9, 113–113. <https://doi.org/10.1186/1475-2875-9-113>

Dabire, R., et al. 2008. Efficacy of a lambda-cyhalothrin longlasting insecticidal net (Lambda LN from Syngenta) against *Anopheles gambiae* in experimental huts in Burkina Faso.



[Unpublished report to the WHO Pesticide Evaluation Scheme (WHOPES).] Report of the twelfth WHOPES working group meeting. WHO/HQ, Geneva 8-11 December 2008. Review of: Bioflash GR, PermaNet 2.0, PermaNet 3.0, PermaNet 2.5, Lambda-cyhalothrin LN. WHO/HTM/NTD/WHOPES/2009.1

Darriet, F., Guillet, P., N'Guessan, R.N., Doannio, J.M.C., Koffi, A.A., Konan, L.Y., Carnevale, P., World Health Organization, 1999. The impact of permethrin and deltamethrin resistance in *Anopheles gambiae* s.s. on the efficacy of insecticide-treated mosquito nets (WHO/MAL/99.1088)

Djenontin, A., Moiroux, N., Bouraima, A., Zogo, B., Sidick, I., Corbel, V., Pennetier, C., 2018. Field efficacy of a new deltamethrin long lasting insecticidal net (LifeNet©) against wild pyrethroid-resistant *Anopheles gambiae* in Benin. BMC public health 18, 947–947. <https://doi.org/10.1186/s12889-018-5876-9>

Fane, M., Cisse, O., Traore, C.S.F., Sabatier, P., 2012. *Anopheles gambiae* resistance to pyrethroid-treated nets in cotton versus rice areas in Mali. Acta tropica 122, 1–6. <https://doi.org/10.1016/j.actatropica.2011.11.013>

Fanello, C., Kolaczinski, J.H., Conway, D.J., Carnevale, P., Curtis, C.F., 1999. The kdr pyrethroid resistance gene in *Anopheles gambiae*: tests of non-pyrethroid insecticides and a new detection method for the gene. Parassitologia. 41(1-3):323-6. PMID: 10697877.

Graham, K., Kayedi, M.H., Maxwell, C., Kaur, H., Rehman, H., Malima, R., Curtis, C.F., Lines, J.D., Rowland, M.W., 2005. Multi-country field trials comparing wash-resistance of PermaNet™ and conventional insecticide-treated nets against anopheline and culicine mosquitoes. Medical and Veterinary Entomology 19, 72–83. <https://doi.org/10.1111/j.0269-283X.2005.00543.x>

Griffin, J.T., Hollingsworth, T.D., Okell, L.C., Churcher, T.S., White, M., Hinsley, W., Bousema, T., Drakeley, C.J., Ferguson, N.M., Basáñez, M.-G., Ghani, A.C., 2010. Reducing Plasmodium falciparum Malaria Transmission in Africa: A Model-Based Evaluation of Intervention Strategies. PLOS Medicine 7, e1000324. <https://doi.org/10.1371/journal.pmed.1000324>

Guillet, P., N'Guessan, R., Darriet, F., Traore-Lamizana, M., Chandre, F., 2001. Combined pyrethroid and carbamate “two-in-one” treated mosquito nets: Field efficacy against pyrethroid-resistant *Anopheles gambiae* and *Culex quinquefasciatus*. Medical and Veterinary Entomology 15, 105–112. <https://doi.org/10.1046/j.1365-2915.2001.00288.x>

Hougard, J.-M., Corbel, V., N'Guessan, R., Darriet, F., Chandre, F., Akogbéto, M., Baldet, T., Guillet, P., Carnevale, P., Traoré-Lamizana, M., 2003. Efficacy of mosquito nets treated with insecticide mixtures or mosaics against insecticide resistant *Anopheles gambiae* and *Culex quinquefasciatus* (Diptera: Culicidae) in Côte d'Ivoire. Bulletin of Entomological Research 93, 491–498. <https://doi.org/10.1079/BER2003261>

Ketoh, G.K., Ahadji-Dabla, K.M., Chabi, J., Amoudji, A.D., Apetogbo, G.Y., Awokou, F., 2018. Efficacy of two PBO long lasting insecticidal nets against natural populations of *Anopheles*

*gambiae* s.l. in experimental huts, Kolokope, Togo. PLoS ONE 13, e0192492–e0192492. <https://doi.org/10.1371/journal.pone.0192492>

Kitau, J., Oxborough, R., Kaye, A., Chen-Hussey, V., Isaacs, E., Matowo, J., Kaur, H., Magesa, S.M., Mosha, F., Rowland, M., Logan, J., 2014. Laboratory and experimental hut evaluation of a long-lasting insecticide treated blanket for protection against mosquitoes. *Parasites and Vectors* 7.

Koffi, A.A., Ahoua Alou, L.P., Djenontin, A., Kabran, J.-P., Dosso, Y., Kone, A., Moiroux, N., 2015a. Efficacy of Olyset Duo, a permethrin and pyriproxyfen mixture net against wild pyrethroid-resistant *Anopheles gambiae* s.s. from Cote d'Ivoire: an experimental hut trial. *Parasite* (Paris, France) 22, 28–28. <https://doi.org/10.1051/parasite/2015028>

Koffi, A.A., et al. 2015b. WHOPES Phase 2 Trial. Field evaluation of a deltamethrin longlasting insecticidal net (Panda Net® 2.0 of Life Ideas Company Ltd) against natural populations of *Anopheles gambiae* in experimental huts in Côte d'Ivoire. DOC/IRD/ABC/20150210 [Unpublished report to the WHO Pesticide Evaluation Scheme (WHOPES)]. Report of the eighteenth WHOPES working group meeting. WHO/HQ, Geneva 29 June - 1 July 2015. Review of: MiraNet LN, Panda Net 2.0 LN, Yahe LN, Safenet LN. WHO/HTM/NTD/WHOPES/2015.2.

Koffi, A.A., et al. 2015c. Field evaluation of a deltamethrin long-lasting insecticidal net (Yahe manufactured by Fujian Yamei Industry, China) against natural populations of *Anopheles gambiae* in experimental huts in Côte d'Ivoire. [Unpublished report to the WHO Pesticide Evaluation Scheme (WHOPES)]. Report of the eighteenth WHOPES working group meeting. WHO/HQ, Geneva 29 June - 1 July 2015. Review of: MiraNet LN, Panda Net 2.0 LN, Yahe LN, Safenet LN. WHO/HTM/NTD/WHOPES/2015.2.

Kolaczinski, J.H., Fanello, C., Herve, J.P., Conway, D.J., Carnevale, P., Curtis, C.F., 2000. Experimental and molecular genetic analysis of the impact of pyrethroid and non-pyrethroid insecticide impregnated bednets for mosquito control in an area of pyrethroid resistance. *Bulletin of Entomological Research* 90, 125–132.

Koudou, B.G., Koffi, A.A., Malone, D., Hemingway, J., 2011. Efficacy of PermaNet® 2.0 and PermaNet® 3.0 against insecticide-resistant *Anopheles gambiae* in experimental huts in Côte d'Ivoire. *Malaria Journal* 10. <https://doi.org/10.1186/1475-2875-10-172>

Kweka, E., et al. 2015. Experimental hut evaluation of MiraNet® against resistant populations of *Anopheles arabiensis* in Northern Tanzania [Unpublished report of Tropical Pesticides Research Institute, Arusha, United Republic of Tanzania]. Report of the eighteenth WHOPES working group meeting. WHO/HQ, Geneva 29 June - 1 July 2015. Review of: MiraNet LN, Panda Net 2.0 LN, Yahe LN, Safenet LN. WHO/HTM/NTD/WHOPES/2015.2.

Kweka, E.J., Lyaruu, L.J., Mahande, A.M., 2017. Efficacy of PermaNet® 3.0 and PermaNet® 2.0 nets against laboratory-reared and wild *Anopheles gambiae* sensu lato populations in northern Tanzania. *Infectious Diseases of Poverty* 6.

Mahande, A.M., Msangi, S., Lyaruu, L.J., Kweka, E.J., 2018. Bio-efficacy of DuraNet long-lasting insecticidal nets against wild populations of *Anopheles arabiensis* in experimental huts. *Tropical Medicine and Health* 46, 36–36. <https://doi.org/10.1186/s41182-018-0118-5>

Malima, R.C., Magesa, S.M., Tungu, P.K., Mwingira, V., Magogo, F.S., Sudi, W., Mosha, F.W., Curtis, C.F., Maxwell, C., Rowland, M., 2008. An experimental hut evaluation of Olyset nets against anopheline mosquitoes after seven years use in Tanzanian villages. *Malaria Journal* 7, 38–38. <https://doi.org/10.1186/1475-2875-7-38>

Malima, R.C., Oxborough, R.M., Tungu, P.K., Maxwell, C., Lyimo, I., Mwingira, V., Mosha, F.W., Matowo, J., Magesa, S.M., Rowland, M.W., 2009. Behavioural and insecticidal effects of organophosphate-, carbamate- and pyrethroid-treated mosquito nets against African malaria vectors. *Medical and veterinary entomology* 23, 317–325. <https://doi.org/10.1111/j.1365-2915.2009.00837.x>

Malima, R., Tungu, P.K., Mwingira, V., Maxwell, C., Magesa, S.M., Kaur, H., Kirby, M.J., Rowland, M., 2013. Evaluation of the long-lasting insecticidal net Interceptor LN: Laboratory and experimental hut studies against anopheline and culicine mosquitoes in northeastern Tanzania. *Parasites and Vectors* 6, 296–296. <https://doi.org/10.1186/1756-3305-6-296>

Miller, J.E., Lindsay, S.W., Armstrong, J.R.M., 1991. Experimental hut trials of bednets impregnated with synthetic pyrethroid or organophosphate insecticide for mosquito-control in The Gambia. *Medical and Veterinary Entomology* 5, 465–476. <https://doi.org/10.1111/j.1365-2915.1991.tb00575.x>

Moore S, et al. 2016. Field evaluation of an alpha-cypermethrin + PBO long-lasting insecticidal net (Veeralin LN) against natural populations of *Anopheles arabiensis* in experimental huts, Tanzania. [Unpublished report to the WHO Pesticide Evaluation Scheme (WHOPES)] Report of the nineteenth WHOPES working group meeting: WHO/HQ, Geneva, 8-11 February 2016: review of Veeralin LN, VectoMax GR, Bactivec SC.

Mosha, F.W., Lyimo, I.N., Oxborough, R.M., Matowo, J., Malima, R., Feston, E., Mndeme, R., Tenu, F., Kulkarni, M., Maxwell, C.A., Magesa, S.M., Rowland, M.W., 2008a. Comparative efficacies of permethrin-, deltamethrin- and  $\alpha$ -cypermethrin-treated nets, against *Anopheles arabiensis* and *Culex quinquefasciatus* in northern Tanzania. *Annals of Tropical Medicine and Parasitology* 102, 367–376. <https://doi.org/10.1179/136485908X278829>

Mosha, F.W., Lyimo, I.N., Oxborough, R.M., Malima, R., Tenu, F., Matowo, J., Feston, E., Mndeme, R., Magesa, S.M., Rowland, M., 2008b. Experimental hut evaluation of the pyrrole insecticide chlorfenapyr on bed nets for the control of *Anopheles arabiensis* and *Culex quinquefasciatus*. *Tropical Medicine and International Health* 13, 644–652. <https://doi.org/10.1111/j.1365-3156.2008.02058.x>

N'Guessan, R., Darriet, F., Doannio, J.M.C., Chandre, F., Carnevale, P., 2001. Olyset Net<sup>®</sup> efficacy against pyrethroid-resistant *Anopheles gambiae* and *Culex quinquefasciatus* after 3

years' field use in Côte d'Ivoire. *Medical and Veterinary Entomology* 15, 97–104.

<https://doi.org/10.1046/j.1365-2915.2001.00284.x>

N'Guessan, R., Corbel, V., Akogbeto, M., Rowland, M., 2007. Reduced efficacy of insecticide-treated nets and indoor residual spraying for malaria control in pyrethroid resistance area, Benin. *Emerging Infectious Diseases* 13, 199–206.

N'Guessan, R., Boko, P., Odjo, A., Knols, B., Akogbeto, M., Rowland, M., 2009. Control of pyrethroid-resistant *Anopheles gambiae* and *Culex quinquefasciatus* mosquitoes with chlorfenapyr in Benin. *Tropical medicine & international health : TM & IH* 14, 389–395.

<https://doi.org/10.1111/j.1365-3156.2009.02245.x>

N'Guessan, R., Asidi, A., Boko, P., Odjo, A., Akogbeto, M., Pigeon, O., Rowland, M., 2010a. An experimental hut evaluation of PermaNet 3.0, a deltamethrin-piperonyl butoxide combination net, against pyrethroid-resistant *Anopheles gambiae* and *Culex quinquefasciatus* mosquitoes in southern Benin. *Transactions of the Royal Society of Tropical Medicine and Hygiene* 104, 758–765.

<https://doi.org/10.1016/j.trstmh.2010.08.008>

N'Guessan, R., Boko, P., Odjo, A., Chabi, J., Akogbeto, M., Rowland, M., 2010b. Control of pyrethroid and DDT-resistant *Anopheles gambiae* by application of indoor residual spraying or mosquito nets treated with a long-lasting organophosphate insecticide, chlorpyrifos-methyl. *Malaria Journal* 9, 44–44.

<https://doi.org/10.1186/1475-2875-9-44>

N'Guessan, R., et al. 2015a. WHOPEs Phase 2 Trial. Experimental hut study of an alphacypermethrin long-lasting insecticidal net (MiraNet LN of A to Z Textile Mills, Tanzania) against natural populations of *Anopheles gambiae* from M'be, Côte d'Ivoire [Unpublished report to the WHO Pesticide Evaluation Scheme (WHOPEs)]. Report of the eighteenth WHOPEs working group meeting. WHO/HQ, Geneva 29 June - 1 July 2015. Review of: MiraNet LN, Panda Net 2.0 LN, Yahe LN, Safenet LN. WHO/HTM/NTD/WHOPEs/2015.2.

N'Guessan, R., et al. 2015b. Wash resistance efficacy of Veeralin® LN against pyrethroid-resistant *Anopheles gambiae*: an experimental hut trial in M'Be, Côte d'Ivoire. [Unpublished joint report of London School of Hygiene & Tropical Medicine, UK and Centre de Recherche Entomologique de Cotonou, Benin submitted to the WHO Pesticide Evaluation Scheme (WHOPEs)]. Report of the nineteenth WHOPEs working group meeting. WHO/HQ, Geneva 8-11 February 2016. Review of: Veeralin LN, Vectomax GR, Bactivec SC. WHO/HTM/NTD/WHOPEs/2016.2.

N'Guessan, R., Odjo, A., Ngufor, C., Malone, D., Rowland, M., 2016a. A chlorfenapyr mixture net InterceptorReg. G2 shows high efficacy and wash durability against resistant mosquitoes in West Africa. *PLoS ONE* 11, e0165925–e0165925.

<https://doi.org/10.1371/journal.pone.0165925>

N'Guessan, R., et al. 2016b. Experimental hut evaluation of an alphacypermethrin + PBO mixture long-lasting insecticidal net Veeralin LN of Vector Control Innovations Pvt Ltd., India against natural populations of *Anopheles gambiae* in M'Be, Côte d'Ivoire. [Unpublished report to the WHO Pesticide Evaluation Scheme (WHOPEs)]. Report of the nineteenth

WHOPES working group meeting. WHO/HQ, Geneva 8-11 February 2016. Review of: Veeralin LN, Vectomax GR, Bactivec SC. WHO/HTM/NTD/WHOPES/2016.2.

Ngufor, C., Chouaibou, M., Tchicaya, E., Loukou, B., Kesse, N., N'Guessan, R., Johnson, P., Koudou, B., Rowland, M., 2014a. Combining organophosphate-treated wall linings and long-lasting insecticidal nets fails to provide additional control over long-lasting insecticidal nets alone against multiple insecticide-resistant *Anopheles gambiae* in Cote d'Ivoire: an experimental hut. *Malaria Journal* 13.

Ngufor, C., Tchicaya, E., Koudou, B., N'Fale, S., Dabire, R., Johnson, P., Ranson, H., Rowland, M., 2014b. Combining organophosphate treated wall linings and long-lasting insecticidal nets for improved control of pyrethroid resistant *Anopheles gambiae*. *PLoS ONE* 9, e83897–e83897. <https://doi.org/10.1371/journal.pone.0083897>

Ngufor, C., N'Guessan, R., Fagbohoun, J., Odjo, A., Malone, D., Akogbeto, M., Rowland, M., 2014c. Olyset Duo® (a pyriproxyfen and permethrin mixture net): an experimental hut trial against pyrethroid resistant *Anopheles gambiae* and *Culex quinquefasciatus* in southern Benin. *PLoS ONE* 9, e93603–e93603. <https://doi.org/10.1371/journal.pone.0093603>

Ngufor, C., N'Guessan, R., Fagbohoun, J., Todjinou, D., Odjo, A., Malone, D., Ismail, H., Akogbeto, M., Rowland, M., 2016a. Efficacy of the Olyset Duo net against insecticide-resistant mosquito vectors of malaria. *Science Translational Medicine* 8, 356ra121-356ra121. <https://doi.org/10.1126/scitranslmed.aad3270>

Ngufor, C., Critchley, J., N'Guessan, R., Akogbeto, M., 2016b. Comparing the efficacy of insecticide mixture and combination strategies for improved control and management of pyrethroid resistant malaria vectors in southern benin, west africa. *American Journal of Tropical Medicine and Hygiene*, 65th Annual Meeting of the American Society of Tropical Medicine and Hygiene, ASTMH 2016. United States. 95, 16–17. <https://doi.org/10.4269/ajtmh.abstract2016>

Ngufor, C., Fagbohoun, J., Critchley, J., N'Guessan, R., Todjinou, D., Malone, D., Akogbeto, M., Rowland, M., 2017. Which intervention is better for malaria vector control: insecticide mixture long-lasting insecticidal nets or standard pyrethroid nets combined with indoor residual spraying? *Malaria Journal* 16. <https://doi.org/10.1186/s12936-017-1987-5>

Ngufor, C., et al. Unpublished short report on Olyset Plus, Olyset and PermaNet 3.0 in Cové, Benin.

Okumu, F.O., Mbeyela, E., Lingamba, G., Moore, J., Ntamatungiro, A.J., Kavishe, D.R., Kenward, M.G., Turner, E., Lorenz, L.M., Moore, S.J., 2013. Comparative field evaluation of combinations of long-lasting insecticide treated nets and indoor residual spraying, relative to either method alone, for malaria prevention in an area where the main vector is *Anopheles arabiensis*. *Parasites and Vectors* 6, 46–46. <https://doi.org/10.1186/1756-3305-6-46>

Oxborough, R.M., Kitau, J., Matowo, J., Feston, E., Mndeme, R., Mosha, F.W., Rowland, M.W., 2013. ITN mixtures of chlorfenapyr (pyrrole) and alphacypermethrin (pyrethroid) for control of pyrethroid resistant *Anopheles arabiensis* and *Culex quinquefasciatus*. PLoS ONE 8, e55781–e55781. <https://doi.org/10.1371/journal.pone.0055781>

Pennetier, C., Bouraima, A., Chandre, F., Piameu, M., Etang, J., Rossignol, M., Sidick, I., Zogo, B., Lacroix, M.-N., Yadav, R., Pigeon, O., Corbel, V., 2013. Efficacy of Olyset Plus, a New Long-Lasting Insecticidal Net Incorporating Permethrin and Piperonyl-Butoxide against Multi-Resistant Malaria Vectors. PLoS ONE 8, e75134–e75134. <https://doi.org/10.1371/journal.pone.0075134>

Rowland, M., et al. Unpublished trial investigating Interceptor G2 in Moshi, Tanzania.

Rowland, M., et al. Unpublished WHOPES trial investigating Interceptor G2 in Muheza, Tanzania.

Sanou, A., et al. Unpublished study based in Tengrela and Tiefora, Burkina Faso.

Sherrard-Smith, E., Griffin, J.T., Winskill, P., Corbel, V., Pennetier, C., Djénontin, A., Moore, S., Richardson, J.H., Müller, P., Edi, C., Protopopoff, N., Oxborough, R., Agossa, F., N'Guessan, R., Rowland, M., Churcher, T.S., 2018. Systematic review of indoor residual spray efficacy and effectiveness against *Plasmodium falciparum* in Africa. Nature Communications 9, 4982. <https://doi.org/10.1038/s41467-018-07357-w>

Sidick, I., et al. 2011. Efficacy of a deltamethrin long-lasting insecticidal net (LifeNet from Bayer) against wild susceptible populations of *Anopheles gambiae* in experimental huts, Benin (DOC/IRD/CREC/02/2011). [Unpublished report to the WHO Pesticide Evaluation Scheme (WHOPES).] Report of the fourteenth WHOPES working group meeting. WHO/HQ, Geneva 11-15 April 2011. Review of: Spinosad EC, LifeNet LN, MAGNet LN, Royal Sentry LN, Yahe LN. WHO/HTM/NTD/WHOPES/2011.7

Toe, K.H., Müller, P., Badolo, A., Traore, A., Sagnon, N., Dabire, R.K., Ranson, H., 2018. Do bednets including piperonyl butoxide offer additional protection against populations of *Anopheles gambiae* s.l. that are highly resistant to pyrethroids? An experimental hut evaluation in Burkina Faso. Medical and Veterinary Entomology 32, 407–416. <https://doi.org/10.1111/mve.12316>

Tungu, P.K., et al. 2008. Evaluation of the lambda-cyhalothrin LN developed by Syngenta against *Anopheles gambiae* and *An. funestus* in experimental huts in Muheza, United Republic of Tanzania. [Unpublished report to the WHO Pesticide Evaluation Scheme (WHOPES).] Report of the twelfth WHOPES working group meeting. WHO/HQ, Geneva 8-11 December 2008. Review of: Bioflash GR, PermaNet 2.0, PermaNet 3.0, PermaNet 2.5, Lambda-cyhalothrin LN. WHO/HTM/NTD/WHOPES/2009.1

Tungu, P.K., et al. 2009. Evaluation of DawaPlus 2.0 LN against *Anopheles gambiae* in experimental huts in Muheza, United Republic of Tanzania. [Unpublished report to the WHO Pesticide Evaluation Scheme (WHOPES).] Report of the thirteenth WHOPES working group

meeting. WHO/HQ, Geneva 28-30 July 2009. Review of: Olyset LN, DawaPlus 2.0 LN, Tianjin Yorkool LN. WHO/HTM/NTD/WHOPES/2009.5.

Tungu, P.K., Magesa, S., Maxwell, C., Malima, R., Masue, D., Sudi, W., Myamba, J., Pigeon, O., Rowland, M., 2010. Evaluation of permanent 3.0 a deltamethrin-PBO combination net against *Anopheles gambiae* and pyrethroid resistant *Culex quinquefasciatus* mosquitoes: An experimental hut trial in Tanzania. *Malaria Journal* 9. <https://doi.org/10.1186/1475-2875-9-21>

Tungu, P., et al. 2012. Evaluation of Olyset Plus LN against *Anopheles gambiae* in experimental huts in Tanzania. [Unpublished report to the WHO Pesticide Evaluation Scheme (WHOPES).] Report of the fifteenth WHOPES working group meeting. WHO/HQ, Geneva 18-22 June 2012. Review of: Olyset Plus, Interceptor LN, Malathion 440 EW, Vectobac GR. WHO/HTM/NTD/WHOPES/2012.5.

Tungu, P., et al. 2013. Evaluation of Yahe LN against *Anopheles gambiae* s.l. and *Culex quinquefasciatus* in experimental huts in Tanzania. National Institute for Medical Research, Amani Research Centre, Muheza, Tanzania and London School of Hygiene and Tropical Medicine, London, UK. [Unpublished report to the WHO Pesticide Evaluation Scheme (WHOPES)]. Report of the sixteenth WHOPES working group meeting. WHO/HQ, Geneva 22-30 July 2013. Review of: Pirimiphos-methyl 300 CS, Chlorfenapyr 240 SC, Deltamethrin 62.5 SC-PE, Duranet LN, Netprotect LN, Yahe LN, Spinosad 83.3 Monolayer DT, Spinosad 25 Extended release GR. WHO/HTM/NTD/WHOPES/2013.6.

Tungu, P., et al. 2015a. WHOPES Phase 2 Trial. Field evaluation of a long-lasting insecticidal net MiraNet LN (alpha-cypermethrin incorporated LN of A to Z Textile Mills, Tanzania) against natural populations of *Anopheles funestus* in experimental huts in Muheza, Tanzania. [Unpublished report to the WHO Pesticide Evaluation Scheme (WHOPES)]. Report of the eighteenth WHOPES working group meeting. WHO/HQ, Geneva 29 June - 1 July 2015. Review of: MiraNet LN, Panda Net 2.0 LN, Yahe LN, Safenet LN. WHO/HTM/NTD/WHOPES/2015.2.

Tungu, P., et al. 2015b. Field evaluation of a long-lasting insecticidal net Panda Net 2.0 LN (deltamethrin incorporated LN of Life Ideas Company Ltd) against natural populations of *Anopheles funestus* and *Anopheles gambiae* s.l. in experimental huts in Muheza, Tanzania. [Unpublished report to the WHO Pesticide Evaluation Scheme (WHOPES)]. Report of the eighteenth WHOPES working group meeting. WHO/HQ, Geneva 29 June - 1 July 2015. Review of: MiraNet LN, Panda Net 2.0 LN, Yahe LN, Safenet LN. WHO/HTM/NTD/WHOPES/2015.2.

Tungu, P., et al. 2016. An experimental hut study to evaluate the efficacy and wash resistance of Interceptor® G2 long-lasting insecticidal nets against natural populations of *Anopheles funestus* and *Anopheles gambiae* s.l. in Muheza, Tanzania. [Unpublished report submitted by BASF to the WHO Pesticide Evaluation Scheme]. Report of the twentieth WHOPES working group meeting, WHO/HQ, Geneva, 20–24 March 2017: review of Interceptor G2 LN, DawaPlus 3.0 LN, DawaPlus 4.0 LN, SumiLarv 2 MR, Chlorfenapyr 240 SC.

Geneva: World Health Organization; (WHO/HTM/NTD/WHOPES/2017.04). Licence: CC BY-NC-SA 3.0 IGO.

Tungu, P., et al. 2017a. WHOPES Phase II study to evaluate the efficacy and wash resistance of Interceptor G2 long-lasting insecticidal nets against natural populations of *Anopheles funestus* in experimental huts in Muheza, Tanzania. [Unpublished report to the WHO Pesticide Evaluation Scheme]. Report of the twentieth WHOPES working group meeting. WHO/HQ, Geneva 20-24 March 2017. Review of: Interceptor G2 LN, DawaPlus 3.0 LN, DawaPlus 4.0 LN, SumiLarv 2 MR, Chlorfenapyr 240 SC. WHO/HTM/NTD/WHOPES/2017.04.

Tungu, P., et al. 2017b. Phase II study to evaluate the efficacy and wash resistance of DawaPlus 3.0 and DawaPlus 4.0 against natural populations of *Anopheles funestus* s.s. in experimental huts in Muheza, Tanzania [Unpublished report to the WHO Pesticide Evaluation Scheme]. 2017; Report of the twentieth WHOPES working group meeting. WHO/HQ, Geneva 20-24 March 2017. Review of: Interceptor G2 LN, DawaPlus 3.0 LN, DawaPlus 4.0 LN, SumiLarv 2 MR, Chlorfenapyr 240 SC. WHO/HTM/NTD/WHOPES/2017.04.

Tungu, P.K., et al. Unpublished study based in Muheza, Tanzania.

Tungu, P.K., Michael, E., Sudi, W., Kisinza, W.W., Rowland, M., 2021. Efficacy of Interceptor® G2, a long-lasting insecticide mixture net treated with chlorfenapyr and alpha-cypermethrin against *Anopheles funestus*: experimental hut trials in north-eastern Tanzania. *Malaria Journal* 20, 180. <https://doi.org/10.1186/s12936-021-03716-z>

Winkler, M.S., Tchicaya, E., Koudou, B.G., Donze, J., Nsanzabana, C., Muller, P., Adja, A.M., Utzinger, J., 2012. Efficacy of ICON® Maxx in the laboratory and against insecticide-resistant *Anopheles gambiae* in central Cote d'Ivoire. *Malaria Journal* 11.
